# Supplementary material for: Species‐specific secretion of ESX‐5 type VII substrates is determined by the linker 2 of EccC5
Source: PubMed Central journal article supplement — Mol Microbiol. 2020 Mar 9;114(1):66–76. doi: 10.1111/mmi.14496 (PMC7384006; doi:10.1111/mmi.14496), 2020-03-09
Supplement: MMI-114-66-s001.pdf [file MMI-114-66-s001.pdf]

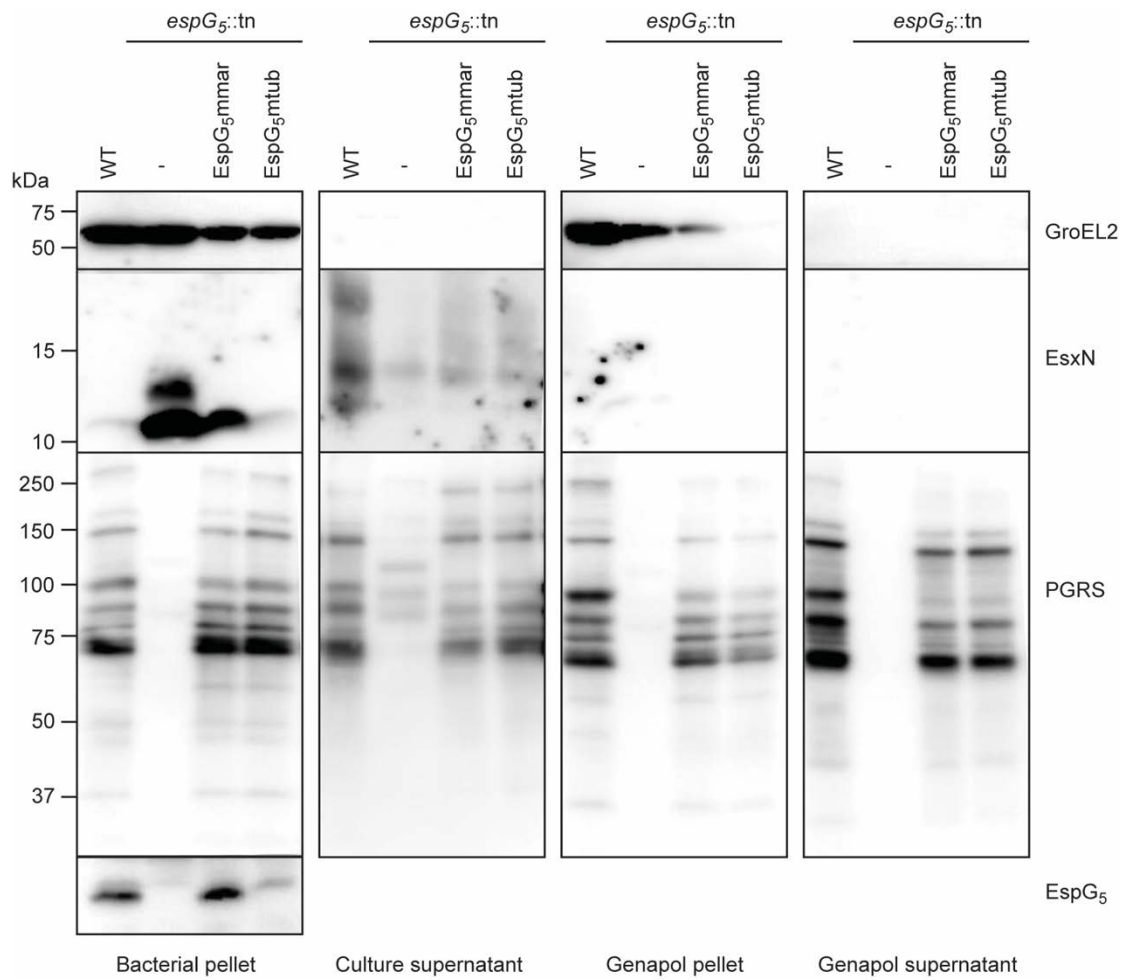

**Figure S1.** EspG<sub>5mtub</sub> complements secretion of a *M. marinum*  $\Delta$ espG<sub>5</sub>. Secretion analysis of *M. marinum* WT,  $\Delta$ espG<sub>5</sub> and  $\Delta$ espG<sub>5</sub> complemented with WT espG<sub>5mmar</sub> or espG<sub>5mtub</sub>. Proteins were visualized by SDS-PAGE and immunoblotting using antibodies against EsxN and PE\_PGRS proteins (ESX-5 substrates), GroEL2 (lysis and whole cell loading control) and EspG<sub>5</sub>.

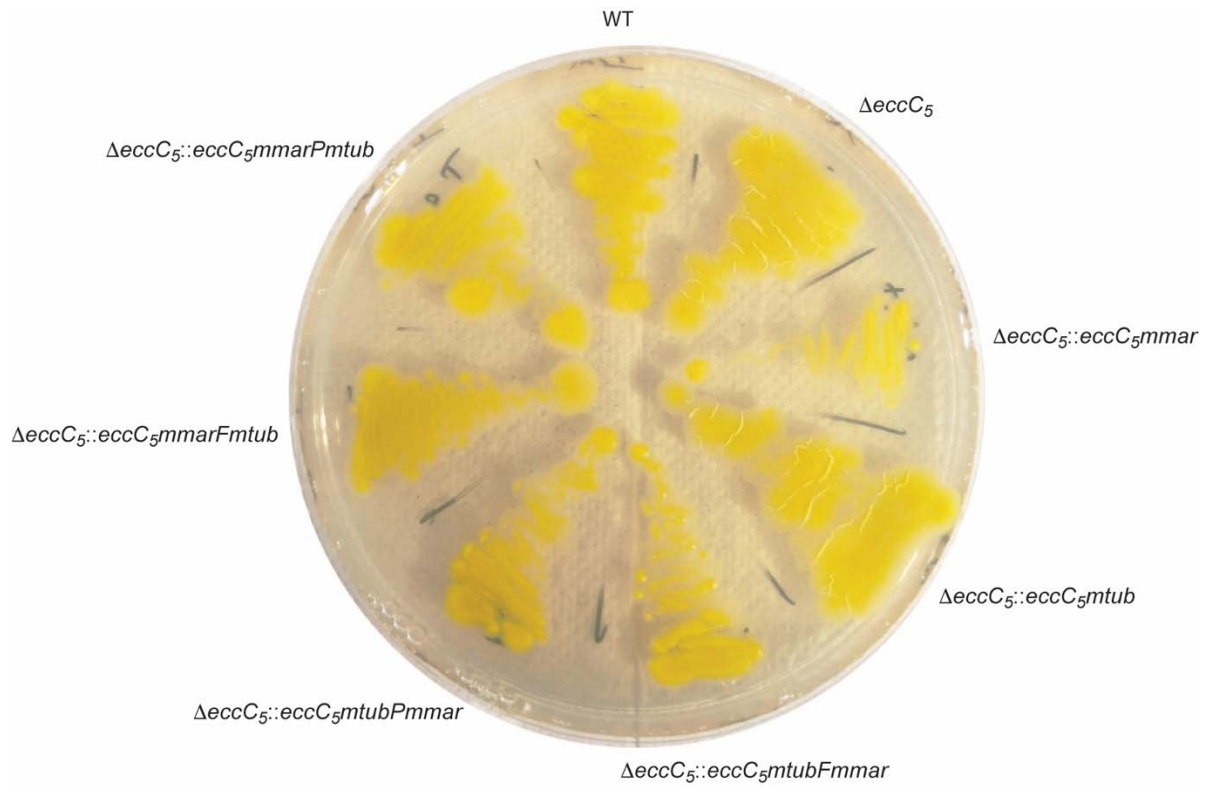

**Figure S2.** Linker 2 of  $EccC_{5mtub}$  affects the macroscopic appearance of *M. marinum*. Colony morphology of *M. marinum* WT,  $\Delta eccC_5$  and  $\Delta eccC_5$  complemented with constructs depicted in Fig. 2B. Strains were streaked on 7H10 agar media supplemented with 10% Middlebrook OADC (BD Biosciences).

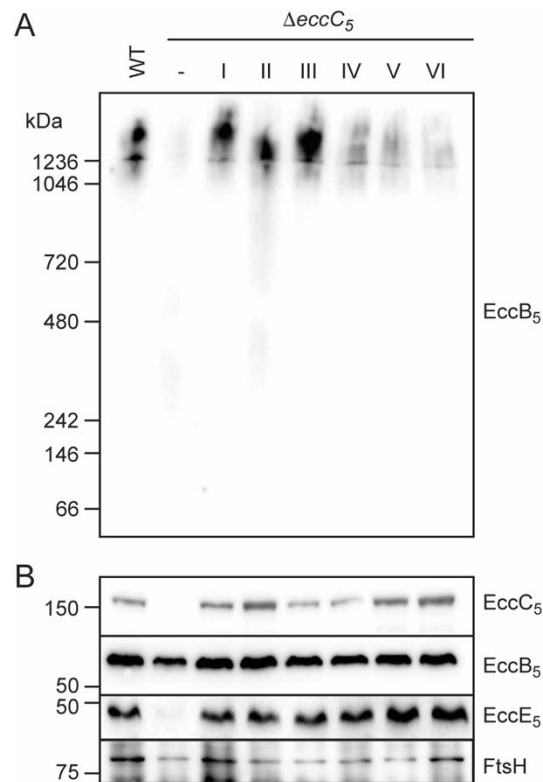

**Figure S3.** ESX-5 membrane complex analysis. (A) BN-PAGE and immunoblot analysis of DDM solubilized cell envelope fractions of *M. marinum* WT,  $\Delta eccC_5$  and  $\Delta eccC_5$  complemented with constructs depicted as in Fig. 2B. (B) SDS-PAGE and immunoblot analysis of the same set of samples as in A. Proteins were visualized using antibodies against EccB<sub>5</sub>, EccC<sub>5</sub>, EccE<sub>5</sub> (membrane proteins forming the ESX-5 membrane complex) and FtsH (membrane protein loading control).

A

```

C5tb      RAEKLMENMGYRLVVKARTAGAAQAAG-VPNAVNLPAQAGLGYFRKSLEDIIRFQAEFLW 713
C5Mar     RAEKLMENMGYRLVVKARTAGAAQAAG-VPNAVNLPAQAGLGYFRKSLEDIIRFQAEFLW 714
TC0607    KLRGLDTHLSYRIGLRTFSAMESRVVLGVDPDAYELPPSPGNGYLKFATEPLVRFKAAYVS 692
           : . *  ::.**: **: : *  :...  **:* :***... *  **:: : *  ::**:* : :

C5TB      RDYFQPGVSIDGEE---APALVHSIDYIRPQLFTNSFTPLEVSVGGPDIEPVVAQPNGEV 770
C5Mar     RDYFQPGITVDGEE---APVLVHSIDYIRPQLFTNSFTPLEVTVGGPEIDKVVAHANGEV 771
TC0607    GPVDEEPQTRSEGPQIVRQVLPYLTDYIRPQVVEQQFPQPEQRA 734
           :   :   .   .   *   :   *   *   *   *   *   *   :   :   :   :   .

C5TB      LESDDIEGGEDEDEEGVRTPKVGTVIDQLRKIKFEPYRLWQPPLTQPVAIDDLVNRFLG 830
C5Mar     VEEVEAEAEE---EGIRVPKVGTVIDQLRRINFEPYRLWQPPLTQPVAIDDLVNRFLG 827
TC0607    EENKSSES-----LFDVVVRQLAGHGPEPHQIWLPPLDVPPTLDELLPPLSP 781
           * . . * .   :   * : : * *   * * : : * * * * * * * : : * : : :

C5TB      RPWHKEYGS----ACNLVFPIGIDRPYKHDQPPWTVDTSGPGANVLILGAGGSGKTTAL 886
C5Mar     HPWQKEYGS----ARNLVFPIGIDRPYKHDQPPWTVDTSGPGSNVLILGAGGSGKTTAL 883
TC0607    SAAHGYTADGWEWRGRLHAVVGLVDRPFDQRRDPDYWLDLSGGAGHVGVAGGPQTGKSTML 841

```

B

```

EsxM_Mtub MASRFMTDPHAMRDMAGRFEVHAQTVEDEARRWASAQNISGAGWSGMAEATSLDTMTXM 60
EsxM_Mmar VTARFMTDPHAMRDMAGRFEMHAQTVEDEARKWASSQNIAGAGWSGMASATSLDTMGQM 60
EsxB_TC   MAPQSAVDRAAMAQAAQDIEQSANAIR-GMQNQLASAKDQLRSHWEGDASMAFEAVFNRF 59
           :: : . *  ** : *  : *  * : : .   .   * : : : :   : * . * . :   . : :

EsxM_Mtub NQAFRNIVNMLHGVRDGLVRDANNYEQQEQASQQILSS----- 98
EsxM_Mmar NTAFRNIVNMLHSVRDGLVRDANNYEQQEQASQQVLRG----- 98
EsxM_Mtub NQAFRNIVNMLHGVRDGLVRDANNYEQQEQASQQILSS----- 98
EsxB_TC   NEDFSRVLKALDGMHESLVQTRITYEAREEAAQSVNRVQALLNG 104
           * * . : : * . : : : * : :   . * * : * : * : * :

```

**Figure S4.** Divergence of Linker 2 sequences. (A) Alignment of the linker 2 region from *M. tuberculosis* H37Rv EccC<sub>5</sub>, *M. marinum* M EccC<sub>5</sub> and *T. curvata* EccC. The C-terminal part of NBD1 and the N-terminal part of NBD2 are highlighted in blue. The sequences that were swapped between constructs EccC<sub>5</sub><sub>mmar</sub>P<sub>mtub</sub> and EccC<sub>5</sub><sub>mtub</sub>P<sub>mmar</sub> (partial linker 2 swap) are depicted in bold. The sequences that were swapped between constructs EccC<sub>5</sub><sub>mmar</sub>F<sub>mtub</sub> and EccC<sub>5</sub><sub>mtub</sub>F<sub>mmar</sub> (full linker 2 swap) are underlined. The missing structural feature of the linker 2 in the *T. curvata* EccC crystal structure (Rosenberg et al., 2015) is stroked through. (B) Sequence alignment between EsxB of *T. curvata* and EsxM from *M. marinum* and *M. tuberculosis*. Alignments were produced using Clustal Omega.

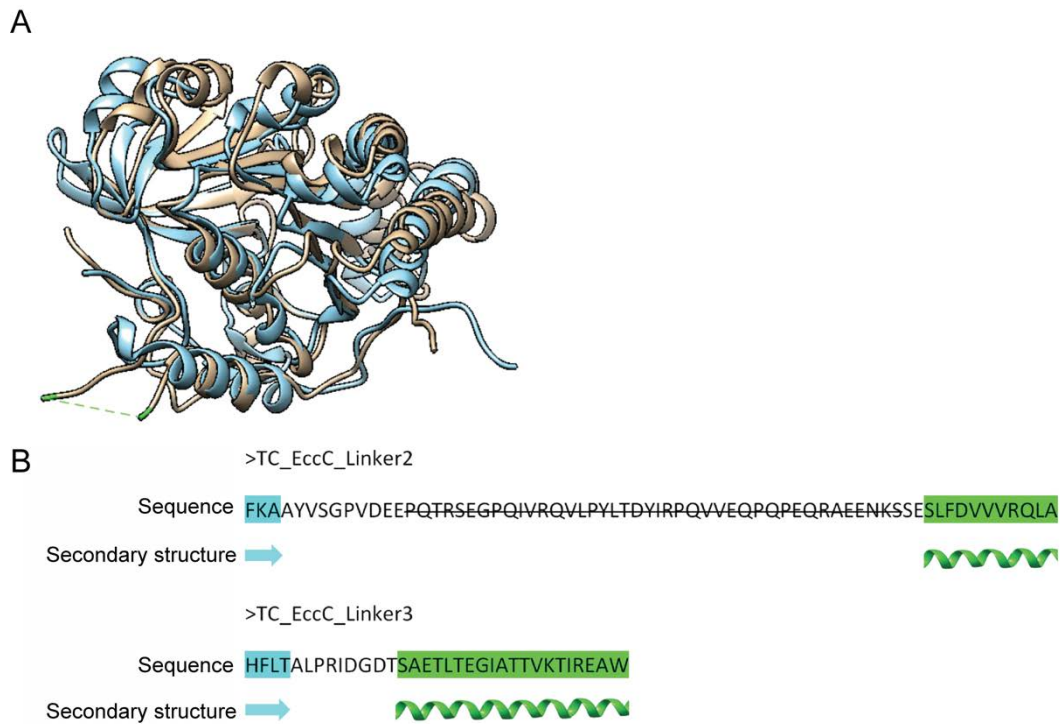

**Figure S5.** Comparison of linker 2 and linker 3. (A) Superimposition of NBD1 (light brown) and NBD2 (light blue) from *T. curvata* (Rosenberg et al., 2015), emphasizing the missing structural feature in the linker 2 region, in green. (B) linker 2 and linker 3 loop sequences with the adjacent upstream  $\beta$ -sheet (blue) and downstream  $\alpha$ -helix (green). The missing structural feature is stroked through in the linker 2 sequence.

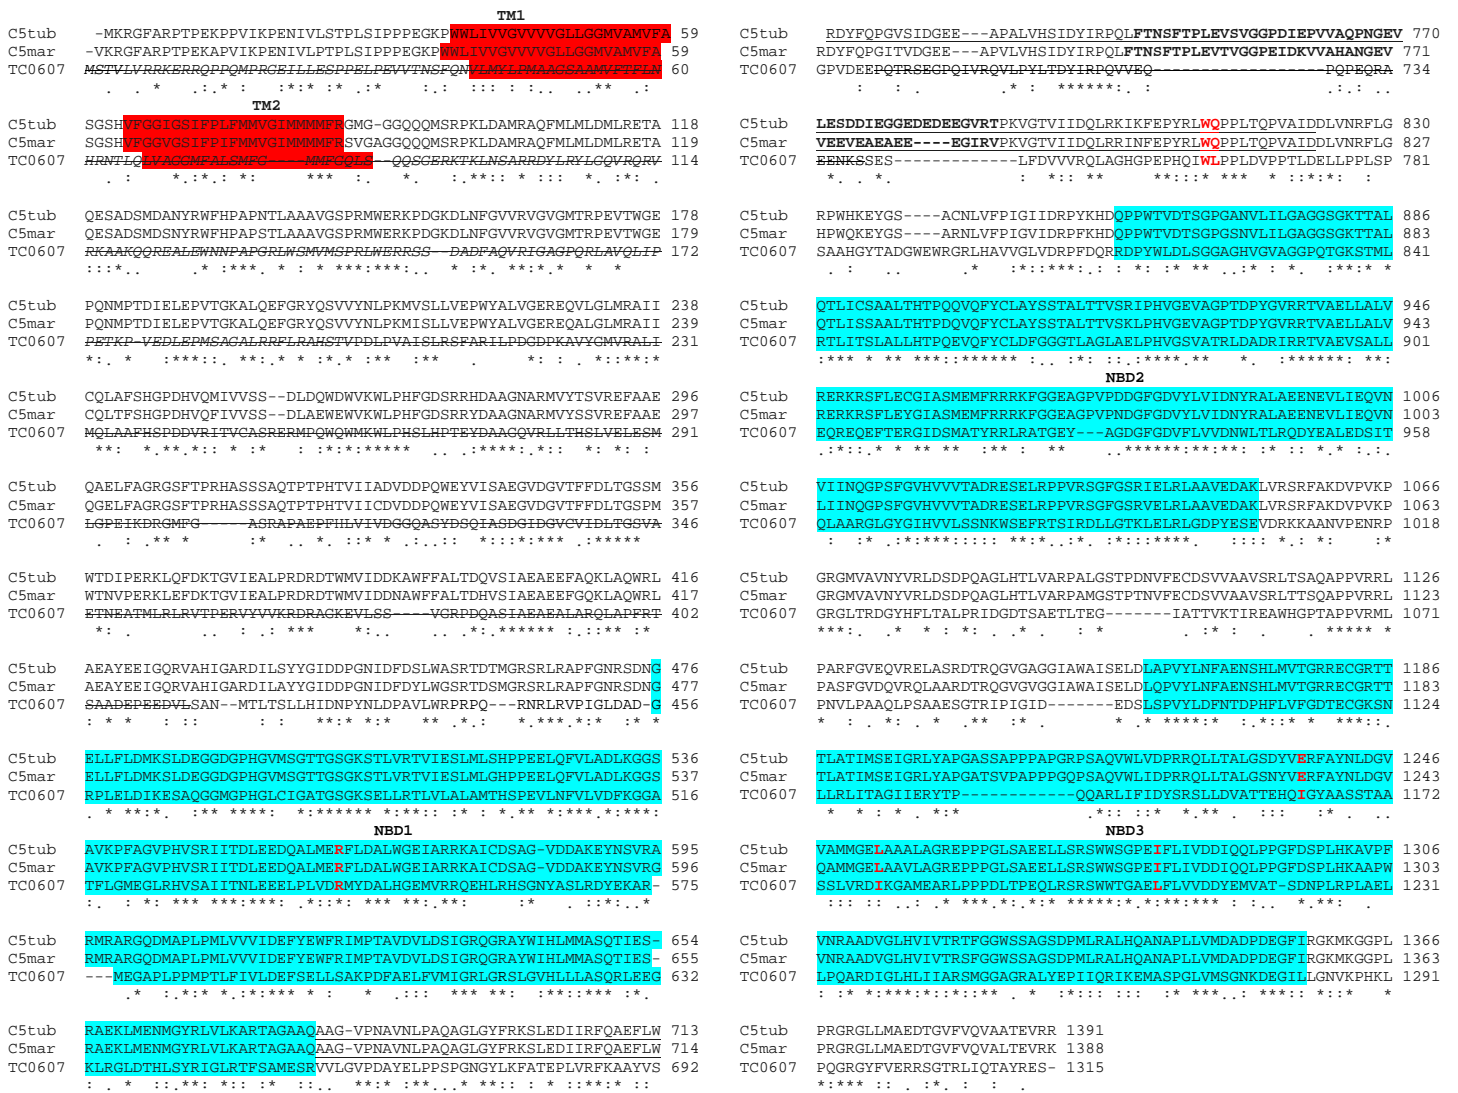

**Figure S6.** Sequence alignment of Ecc<sub>5</sub> of *M. tuberculosis* H37Rv (C5tub), Ecc<sub>5</sub> of *M. marinum* M (C5mar), and Ecc<sub>5</sub> of *T. curvata* (TC0607). The missing features in the crystal structure of *T. curvata* EccC are stroked through, including the linker 2 region (Rosenberg *et al.*, 2015). Transmembrane domains are highlighted in red and that are important for substrate binding to NBD3 are in red. The underlined sequence represents the “Full linker 2”, which was swapped between the two Ecc<sub>5</sub> homologs. The sequence corresponding to the “Partial linker 2” swapped region is depicted in bold. The alignment was produced using Clustal Omega.

| <b>Walker B</b>     |                                                                |                               |
|---------------------|----------------------------------------------------------------|-------------------------------|
| EccCab1_M_tub       | TLFVVVDEFAELLQSHPDFIGLFDRIICRVGRSLRVHLLLATQ                    | SLQTGGVVRIDKLEPNLTY 652       |
| EccCab1_M_marinum   | TLFVVVDEFAELLQSHPDFIGLFDRIICRVGRSLRVHLLLATQ                    | SLQTGGVVRIDKLEPNLTY 652       |
| EccC2_M_tub         | VLLVIVDEYLELFANHKKWIDLIHIGQEGRGANVFFMLGGQ                      | RLDLSS--LQKVKSNIAF 687        |
| EccC3_M_marinum     | TLFVVVADEFITMLADHPEYAEFLFDYVARKGRSFRIHILFASQ                   | TLDVVGK--IKDIDKNTSY 654       |
| EccC3_M_tub         | TLFVVVADEFITMLADHPEYAEFLFDYVARKGRSFRIHILFASQ                   | TLDVVGK--IKDIDKNTAY 649       |
| EccC4_M_marinum     | TLFIIVDEFAELLSQHPDFAEVFVAIGRLGRSLGMHLLLASQ                     | RLEEEGR--LRGLEAHLISY 584      |
| EccC4_M_tub         | ILFIIVDEFSELLSQHPDFVDVFLAIGRVGRSLGMHLLLASQ                     | RLDEGR--LRGLETHLSY 594        |
| EccC5_M_marinum     | MLVVVIDEFYEWFRIMPTAVDVLDSIGRQGRAYWIHLMMASQ                     | TIESR---AEKLMENMGY 666        |
| EccC5_M_tub         | MLVVVIDEFYEWFRIMPTAVDVLDSIGRQGRAYWIHLMMASQ                     | TIESR---AEKLMENMGY 665        |
|                     | *.: : **:                                                      | : : : : * . : : : : * : :     |
|                     |                                                                |                               |
| EccCab1_M_tub       | RIALRTTSSHESKAVIGTPEAQYITNK--ESGVGFL-RVGMEDPVKFFSTFYISGPYMPPA  | 709                           |
| EccCab1_M_marinum   | RIALRTTSSHESKAVIGTPEAQYITNK--ESGVGFL-RVGMEDPIKFFSTLYISGPYVPPA  | 709                           |
| EccC2_M_tub         | RIALRAESGDDSRVIGSDAAYHLPK--ENGFALL-KVGPRLDEPFRCFYLSAPFVVPK     | 744                           |
| EccC3_M_marinum     | RIGLKVASASVSRQIIGVEDAYHIEAGKEHKGVGFLVPAPGAAPIRFRSTYVDGIYEPQP   | 714                           |
| EccC3_M_tub         | RIGLKVASPSVSRQIIGVEDAYHIEAGKEHKGVGFLVPAPGATPIRFRSTYVDGIYEPQP   | 709                           |
| EccC4_M_marinum     | RVCLKTLSAIESRTALGTDAFELPNT---PGSGLL-SSPTAELTRFETAFVSGPVPAGP    | 640                           |
| EccC4_M_tub         | RMCLKTWSASESRNVLTQDAYQLPNT---PGAGLL-QTGTGELIRFQTAFAVSGPLRRAS   | 650                           |
| EccC5_M_marinum     | RLVLKARTAGA-AQAAGVNPVAVNLPQAQ---AGLGYF-RKSLEDIRFQAEFLWRDYFQPG  | 721                           |
| EccC5_M_tub         | RLVLKARTAGA-AQAAGVNPVAVNLPQAQ---AGLGYF-RKSLEDIRFQAEFLWRDYFQPG  | 720                           |
|                     | *: * . : :                                                     | * * : : * . : : * : :         |
|                     |                                                                |                               |
| EccCab1_M_tub       | AGVETNGEA-GGPGQQT-----RQAARIHRFTAAPVLEEAP-----                 | 745                           |
| EccCab1_M_marinum   | T-AETNGDG-SGPSTQFA-----KRALQIREFTAAPVLEEAL-----                | 744                           |
| EccC2_M_tub         | KKEVART-----IDMTLTQPRLYDWQYQPLDAADAEA---LATAAAAADAEPEDEF-----  | 790                           |
| EccC3_M_marinum     | QTKTRVVHN-----IPEPKLFTATAVEPDPDPTV--I SEV                      | 746                           |
| EccC3_M_tub         | TAKAVVVQS-----VPEPKLFTAAAVEPDPDPTV--IADT                       | 741                           |
| EccC4_M_marinum     | PDADSV-AL-----PAAVRPFTSEATGDRV-----GG                          | 667                           |
| EccC4_M_tub         | PSAVHP-VA-----PPSVRPFTHAAAPVTA-----GP                          | 677                           |
| EccC5_M_marinum     | ITVDGEEAPVLVHSIDYIRPQLFTNSFTPLEVTVGGEIDKVVVAHANGEVVEVEA-----   | 777                           |
| EccC5_M_tub         | VSIDGEEAPALVHSIDYIRPQLFTNSFTPLEVTVGGPDIEPVVAQPNGEVLESDDIEGGE   | 780                           |
|                     | . :                                                            |                               |
| <b>Start EccCb1</b> |                                                                |                               |
| EccCab1_M_tub       | TPMTAEPEVRTLREVLDQLGTA-ESRAYKMWLPPLTNPVPLNELIARDR-----R-       | 795                           |
| EccCab1_M_marinum   | TPMTAEPEVRTLREVILDQLSTV-ESRAYKMWLPPLVDPTPLDELVARDR-----R-      | 794                           |
| EccC2_M_tub         | LYYDDGFKKKKIVDVLRESLYNPHRSPRRPWLPAPLEDEPEVDRLVAAYRGKPPWHVDYQG  | 850                           |
| EccC3_M_marinum     | EEEHVPGPPRKLIIATIGEQLARY-GPQAPRLWLPPLDEPIPLSTLLATAG-----VA     | 797                           |
| EccC3_M_tub         | DEQEPADPPRKLIIATIGEQLARY-GPRAPQLWLPPLDETIPLSAALARAG-----VG     | 792                           |
| EccC4_M_marinum     | ADGADTATGPTVLQTVLDRIAGH-GPRAHQVWLPPLDRAPALASLLSDGA-----AE      | 718                           |
| EccC4_M_tub         | VGGTAEVPTPTVLHVAVLDRLVGH-GPAAHQVWLPPLDEPPMLGALLRDAE-----PA     | 728                           |
| EccC5_M_marinum     | EAEHEGIRVPKVGTVIIDQLRRI-NFEPYRLWQPPLTQPVAIDDLVNRFLGHPWQKEYGS   | 836                           |
| EccC5_M_tub         | DEDEEGVRTPKVGTVIIDQLRRI-KFEPYRLWQPPLTQPVAIDDLVNRFLGRPWHKEYGS   | 839                           |
|                     | . : . : : :                                                    | : * ** : :                    |
|                     |                                                                |                               |
| <b>Walker A</b>     |                                                                |                               |
| EccCab1_M_tub       | -QPLRFALGIMDEPRRHLQDVWGVDVSGAGNIGIGGAPQTGKSTLLQTMVMSAAATHSP    | 854                           |
| EccCab1_M_marinum   | -QPLRFALGIMDEPRRHLQDVWGVDVSGAGNIGIGGAPQTGKSTLLQTLVMSAAATHSP    | 853                           |
| EccC2_M_tub         | NPGLMFPVGMIDIPESQVVHAVDA--LRSNIIIVGAKQRGKTTTLMALMCSAATMYTP     | 908                           |
| EccC3_M_marinum     | QRQWRWPLGEIDKPFEMRRDPLVFDATSSAGNLVIHGGPKSGKSTALQSFMLSAASLHSP   | 857                           |
| EccC3_M_tub         | PRQWRWPLGEIDRPFEMRRDPLVFDARSSAGNMVIHGGPKSGKSTALQTFILSAASLHSP   | 852                           |
| EccC4_M_marinum     | HAELAVPIGVVDRPFDQSRPTLIDLTAAAGNVAVVVGAPQSGKSTTLSTLITALAATHDP   | 778                           |
| EccC4_M_tub         | QAEAVPIGIVDRPFEQSRVPLTIDLSGAAGNVAVVVGAPQTGKSTALRTLIMALAATHDA   | 788                           |
| EccC5_M_marinum     | ARNLVFPIGVIDRPFKHDQPPWTVDTSGPGSNVLIILGAGGSGKTTALQTLISSAALHTTP  | 896                           |
| EccC5_M_tub         | ACNLVFPIGIIDRPFYKHDQPPWTVDTSGPGANVLIILGAGGSGKTTALQTLICSAALHTTP | 899                           |
|                     | : * : * * :                                                    | : * : * . * * * * : : : * : : |

**Figure S7.** Alignment of all EccC homologs of *M. marinum* M and *M. tuberculosis* H37Rv. Part of the linker 2 region, which shows no sequence homology and overlaps largely with the missing structural feature of the *T. curvata* EccC and the “Partial linker 2 swap” constructs, is highlighted in grey. the C-terminal part of NBD1 and the N-terminal part of NBD2 are highlighted in blue. Walker A and B motifs are highlighted in green. The first residue of EccCb1 is depicted in red. The alignment was produced using Clustal Omega.

**Table S1.** List of plasmids used in this study.

| <b>Nr.</b> | <b>Plasmid</b>                              | <b>Features</b>                                                                            | <b>Source</b>     |
|------------|---------------------------------------------|--------------------------------------------------------------------------------------------|-------------------|
| 1.         | pMV-espG <sub>5mtub</sub>                   | <i>hsp60</i> promotor, L5 <i>attP</i> & <i>aph</i> , <i>oriE</i> , <i>hyg</i> <sup>R</sup> | This study        |
| 2.         | pMV-espG <sub>5mmar</sub>                   | <i>hsp60</i> promotor, L5 <i>attP</i> & <i>aph</i> , <i>oriE</i> , <i>hyg</i> <sup>R</sup> | Phan et al., 2017 |
| 3.         | pMV-eccC <sub>5mtub</sub>                   | <i>hsp60</i> promotor, L5 <i>attP</i> & <i>aph</i> , <i>oriE</i> , <i>kan</i> <sup>R</sup> | This study        |
| 4.         | pMV-eccC <sub>5mmar</sub>                   | <i>hsp60</i> promotor, L5 <i>attP</i> & <i>aph</i> , <i>oriE</i> , <i>kan</i> <sup>R</sup> | Ates et al., 2015 |
| 5.         | pMV-eccC <sub>5mtub</sub> F <sub>mmar</sub> | <i>hsp60</i> promotor, L5 <i>attP</i> & <i>aph</i> , <i>oriE</i> , <i>kan</i> <sup>R</sup> | This study        |
| 6.         | pMV-eccC <sub>5mtub</sub> P <sub>mmar</sub> | <i>hsp60</i> promotor, L5 <i>attP</i> & <i>aph</i> , <i>oriE</i> , <i>kan</i> <sup>R</sup> | This study        |
| 7.         | pMV-eccC <sub>5mmar</sub> F <sub>mtub</sub> | <i>hsp60</i> promotor, L5 <i>attP</i> & <i>aph</i> , <i>oriE</i> , <i>kan</i> <sup>R</sup> | This study        |
| 8.         | pMV-eccC <sub>5mmar</sub> P <sub>mtub</sub> | <i>hsp60</i> promotor, L5 <i>attP</i> & <i>aph</i> , <i>oriE</i> , <i>kan</i> <sup>R</sup> | This study        |



**Table S2.** List of primers used in this study.

| <b>Nr.</b> | <b>Name</b>                     | <b>Sequence (5' - 3')</b>               |
|------------|---------------------------------|-----------------------------------------|
| 1.         | EsxMtub_Xmnl_F                  | GACTGAAAGAATTCCAT ATGGCCTCACGTTTTAT GAC |
| 2.         | EspG5tub_HindIII_R              | GACTAAGCTTTTCATACTCTGCTGTGTGTTTTTC      |
| 3.         | EccC5tub_Xmnl_F                 | GACTGAAAGAATTCCAT ATGAAGCGT GGTTTTGCCC  |
| 4.         | EccC5tub_HindIII_R              | GACTAAGCTTCTACCGACGCACCTCGG             |
| 5.         | C5tub_MunI.fw                   | CCC GCAATTGTT CACCAACTCATT CAC          |
| 6.         | C5tub_interswap.fw              | GAAGAAGGCATCCGAGT GCCGAAGGTT GGGAC GGT  |
| 7.         | C5_swap_1_FW 69C                | ATATGGCCGGCAGGGCCGT GCCTATTG            |
| 8.         | C5_swap_1_RV 67C                | GTCGATCGCGACGGGCTG                      |
| 9.         | C5_swap_2_FW 62C                | CCCGTCGCGATCGACGACTTG                   |
| 10.        | C5_swap_2_RV 65C                | CTGATCACCGCGGCCATG                      |
| 11.        | C5 mar Tb full domain 1 FW      | ATCCGGAGGAAAGAATTCTATTGCCGCAAGGCCCGACG  |
| 12.        | C5 mar Tb full domain 1 RV      | GTCGATGCTGACGCCGGGCTGGAAGTAGTCC         |
| 13.        | C5 mar Tb full domain 2 FW      | GGCGTCAGCATCGACGGCGA                    |
| 14.        | C5 mar Tb full domain 2 RV      | ACCGGTTGACCAGGTCGTCGATGGCGAC            |
| 15.        | C5 mar Tb full domain 3 FW      | GACCTGGTCAACCGGTTCTCTG                  |
| 16.        | C5 mar Tb full domain 3 RV      | CGACATCGATAAGCTTTTACTTTTCGCACCTCGGTC    |
| 17.        | C5 mar partial TB interdom 1 RV | GAACGAGTTGGTAAACAAC TGC GGGCGAAT G      |
| 18.        | C5 mar partial TB interdom 2 FW | CATTGCCCCGAGTTGTTTACCAACTCGTTC          |
| 19.        | C5 mar partial TB interdom 2 RV | GTACCCACCTTGGGGGTGCGCACCCCTC            |
| 20.        | C5 mar partial TB interdom 3 FW | GCACCCCAAGGTGGGTACCGTGATC               |
